# Supplementary material for: Solid Lipid Nanoparticles Containing Morin: Preparation, Characterization, and Ex Vivo Permeation Studies
Source: MDPI journal article supplement (doi:10.3390/pharmaceutics15061605), 2023-05-28
Supplement: s1 [file s1]

# Solid lipid nanoparticles containing Morin: preparation, characterization, and *ex vivo* permeation studies.

Federica De Gaetano<sup>1</sup>, Consuelo Celesti<sup>2</sup>, Giuseppe Paladini<sup>3</sup>, Valentina Venuti<sup>4</sup>, Maria Chiara Cristiano<sup>5</sup>, Donatella Paolino<sup>6</sup>, Daniela Iannazzo<sup>2</sup>, Vincenza Strano<sup>7</sup>, Anna Gueli<sup>3</sup>, Silvana Tommasini<sup>1</sup>, Cinzia Anna Ventura<sup>1\*</sup>, Rosanna Stancanelli<sup>1</sup>

<sup>1</sup> Department of Chemical, Biological, Pharmaceutical and Environmental Sciences, University of Messina, V.le Ferdinando Stagno d'Alcontres 31, I-98166 Messina, Italy; fedegaetano@unime.it; stommasini@unime.it; rstancanelli@unime.it

<sup>2</sup> Department of Engineering, University of Messina, Contrada Di Dio, I-98166 Messina, Italy; ccelesti@unime.it

<sup>3</sup> Department of Physics and Astronomy "Ettore Majorana", University of Catania, Via S. Sofia, 64 I-95123 Catania, Italy; anna.gueli@unict.it

<sup>4</sup> Department of Mathematical and Computer Sciences, Physical Sciences and Earth Sciences, University of Messina, V.le Ferdinando Stagno D'Alcontres 31, I-98166 Messina, Italy; vvenuti@unime.it

<sup>5</sup> Department of Medical and Surgical Sciences University of Catanzaro "Magna Graecia", V.le Europa s.n.c., I-88100 Catanzaro, Italy; mchiara.cristiano@unicz.it

<sup>6</sup> Department of Experimental and Clinical Medicine, University of Catanzaro "Magna Graecia", V.le Europa s.n.c., I-88100 Catanzaro, Italy; paolino@unicz.it

<sup>7</sup> CNR-IMM, Catania (University) Unit, Via S. Sofia 64, I-95123 Catania, Italy; vincenzina.strano@ct.infn.it

\* Correspondence: cavenatura@unime.it (C.A.V.)

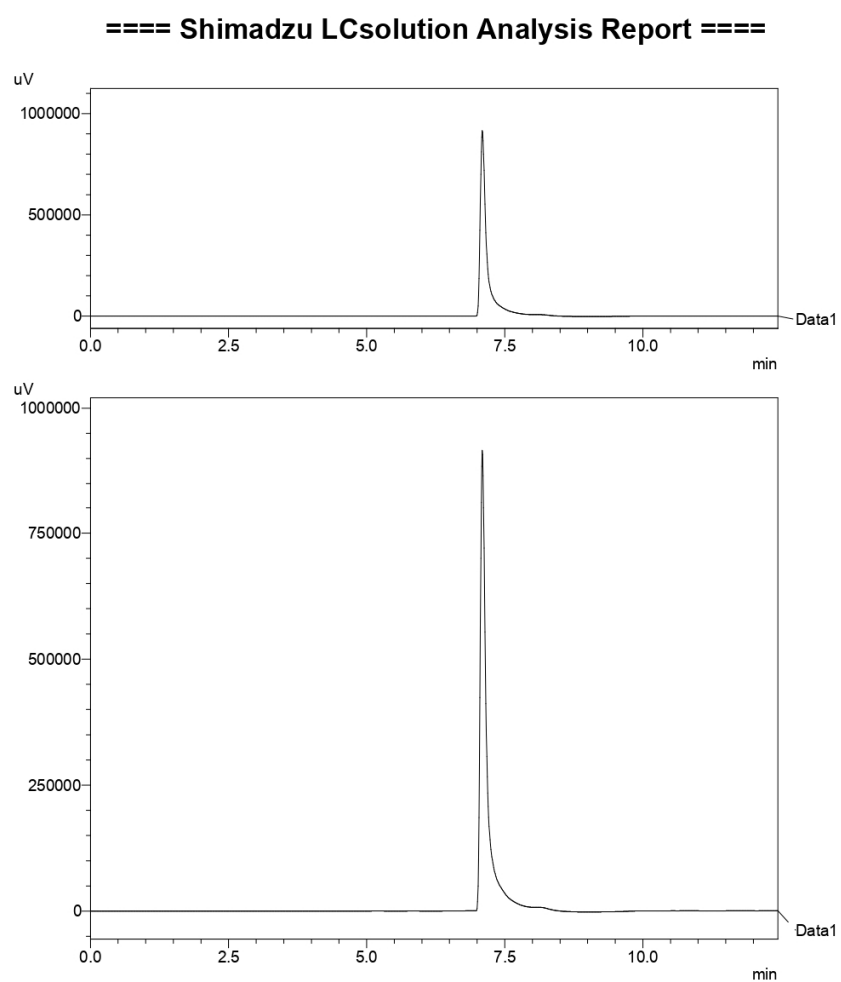

**Figure S1.** MRN chromatogram (100 µg/mL concentration). See material and methods section for the operative conditions.

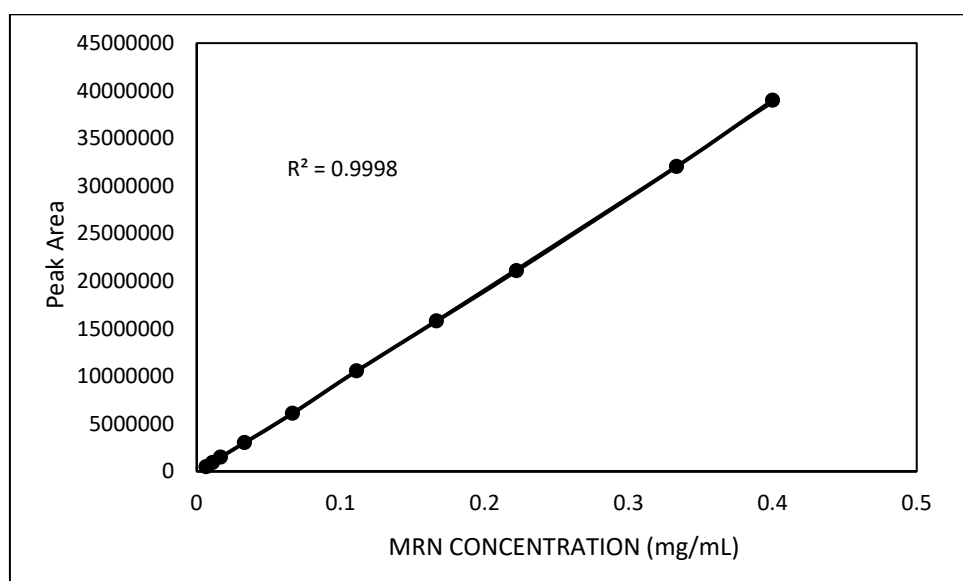

**Figure S2.** Plot of peak area vs. MRN concentration
